1 **County-level exposures to greenness and associations with COVID-19 incidence and**  
2 **mortality in the United States**

3  
4 Jochem O Klomp maker <sup>a</sup>, Jaime E Hart <sup>a,b</sup>, Isabel Holland <sup>b</sup>, M Benjamin Sabath <sup>c</sup>, Xiao Wu <sup>c</sup>,  
5 Francine Laden <sup>a,b,d</sup>, Francesca Dominici <sup>c</sup>, Peter James <sup>a,e</sup>

6  
7 <sup>a</sup> *Department of Environmental Health, Harvard T. H. Chan School of Public Health, 655*  
8 *Huntington Avenue, Boston, Massachusetts 02115*

9 <sup>b</sup> *Channing Division of Network Medicine, Department of Medicine, Brigham and Women's*  
10 *Hospital, 181 Longwood Avenue, Boston, Massachusetts 02115*

11 <sup>c</sup> *Department of Biostatistics, Harvard T.H. Chan School of Public Health, 677 Huntington*  
12 *Avenue, Boston, Massachusetts 02115*

13 <sup>d</sup> *Department of Epidemiology, Harvard T. H. Chan School of Public Health, 677 Huntington*  
14 *Avenue, Boston, Massachusetts 02115*

15 <sup>e</sup> *Department of Population Medicine, Harvard Medical School and Harvard Pilgrim Health*  
16 *Care Institute, 401 Park Drive, Boston, Massachusetts 02215*

17  
18 **Corresponding author:**

19 Jochem O Klomp maker, PhD

20 Postdoctoral fellow

21 Department of Environmental Health

22 Harvard T. H. Chan School of Public Health

23  
24 Landmark Center, 401 Park Drive, Boston MA 02215

25 [jklomp maker@hsph.harvard.edu](mailto:jklomp maker@hsph.harvard.edu)

26  
27 **RUNNING TITLE:** Greenness and COVID-19 incidence and mortality

28  
29 **KEY WORDS:** green space, Coronavirus, epidemiology, environmental health

30  
31 **Declaration of interest**

32 The authors declare they have no actual or potential competing financial interests.

33  
34 **Acknowledgement**

35 This study was funded by R01HL150119, R01ES028033 and P30 ES000002.

36  
37  
38  
39  
40  
41  
42  
43  
44  
45  
46

47 **Abstract**

48 Background: COVID-19 is an infectious disease that has killed more than 246,000 people in the  
49 US. During a time of social distancing measures and increasing social isolation, green spaces  
50 may be a crucial factor to maintain a physically and socially active lifestyle while not increasing  
51 risk of infection.

52 Objectives: We evaluated whether greenness is related to COVID-19 incidence and mortality in  
53 the United States.

54 Methods: We downloaded data on COVID-19 cases and deaths for each US county up through  
55 June 7, 2020, from Johns Hopkins University, Center for Systems Science and Engineering  
56 Coronavirus Resource Center. We used April-May 2020 Normalized Difference Vegetation  
57 Index (NDVI) data, to represent the greenness exposure during the initial COVID-19 outbreak in  
58 the US. We fitted negative binomial mixed models to evaluate associations of NDVI with  
59 COVID-19 incidence and mortality, adjusting for potential confounders such as county-level  
60 demographics, epidemic stage, and other environmental factors. We evaluated whether the  
61 associations were modified by population density, proportion of Black residents, median home  
62 value, and issuance of stay-at-home order.

63 Results: An increase of 0.1 in NDVI was associated with a 6% (95% Confidence Interval: 3%,  
64 10%) decrease in COVID-19 incidence rate after adjustment for potential confounders.  
65 Associations with COVID-19 incidence were stronger in counties with high population density  
66 and in counties with stay-at-home orders. Greenness was not associated with COVID-19  
67 mortality in all counties; however, it was protective in counties with higher population density.

68 Discussion: Exposures to NDVI had beneficial impacts on county-level incidence of COVID-19  
69 in the US and may have reduced county-level COVID-19 mortality rates, especially in densely  
70 populated counties.

71  
72  
73  
74  
75  
76  
77  
78  
79  
80  
81  
82  
83  
84  
85  
86  
87  
88  
89  
90  
91  
92

## 93 **Introduction**

94 The global spread of Severe Acute Respiratory Syndrome Coronavirus 2 (SARS-CoV-2), the  
95 virus responsible for COVID-19, has caused a worldwide public health emergency. (Sohrabi et  
96 al. 2020; WHO 2020a) The outbreak was declared a pandemic by the World Health Organization  
97 (WHO) on March 11, 2020, (WHO 2020b) and as of November 16, 2020, 54.5 million cases of  
98 COVID-19 had been documented worldwide, and more than 1.3 million deaths had been  
99 recorded. (Johns Hopkins Coronavirus Resource Center 2020) To date, there are few effective  
100 therapies and no vaccine, therefore public health measures at the population level (e.g. social  
101 distancing measures, stay-at-home orders, public education initiatives (Prem et al. 2020; Tammes  
102 2020)) have been the primary approach for reducing transmission.

103  
104 The coronavirus pandemic presents an unprecedented situation for the globe; however, this is not  
105 the first time the world has confronted a large-scale infectious disease threat. Historical  
106 approaches to combat infectious disease outbreaks provide crucial lessons that we can still apply  
107 today. One of those approaches is the use of urban parks as a resilience measure. Frederick Law  
108 Olmsted, who designed New York’s Central Park, Boston’s Emerald Necklace, and many other  
109 major urban parks, championed the concept of “parks as lungs” and he espoused “two great  
110 natural agents of disinfection: sunshine, and fall foliage”.(Beveridge and Hoffman 1997)

111  
112 The spread of infectious diseases, like COVID-19, is dependent on the duration of  
113 infectiousness, transmissibility, and the contact rate.(Heederik et al. 2020; Delamater et al. 2019)  
114 These three factors generally summarize the basic reproduction number (R0). R0 is affected by  
115 numerous biological, socio-behavioral and environmental factors that influence pathogen  
116 transmission.(Delamater et al. 2019) Green spaces may influence the contact rate and in turn the  
117 reproduction number, as they provide a setting to obtain much needed physical activity and a  
118 place for social interactions while remaining the recommended safe distance (six feet). Because  
119 these activities take place outdoors, wind dilutes the amount of virus in the air substantially  
120 (Qian et al. 2020), which greatly decreases transmission risk. In addition, theory (Ulrich 1984;  
121 Kaplan & Kaplan 1989) and empirical evidence (Banay et al. 2019; Bezold et al. 2018) suggests  
122 that living near green spaces allows us to restore our attention and decrease stress, leading to  
123 lower incidence of depression, anxiety, and other negative psychological factors. During a time  
124 of social distancing measures and increasing social isolation, urban green spaces may be a  
125 crucial factor to maintain a physically and socially active lifestyle while not increasing risk of  
126 infection.

127  
128 To quantify whether greenness is related to COVID-19 incidence and mortality, we compiled  
129 county level data on both greenness and COVID-19 outcomes. Furthermore, based on evidence  
130 that there are large disparities in incidence and mortality rates, we evaluated whether the  
131 relationship between greenness and incidence/mortality differed according to county-level  
132 population density, percentage of black residents, median home value and issuance of stay-at-  
133 home orders.

## 134 135 **Methods**

136 Data used in this study are publicly available and links to each of the data sources can be found  
137 in Table S1.

138

139 *COVID-19 incidence and mortality data*

140 The Johns Hopkins University Center for Systems Science and Engineering Coronavirus  
141 Resource Center provides daily updates about COVID-19 death counts and cases for each  
142 country.(Dong et al. 2020) For the US, county level data is provided by the US Centers for  
143 Disease Control and Prevention (CDC) and State governments. The number of COVID-19 cases  
144 is the sum of the number of deaths and active cases. As of April 14, 2020, CDC case counts and  
145 death counts included both confirmed and probable cases and deaths in accordance with CDC  
146 guidelines.(CDC 2020)

147  
148 We downloaded data on the cumulative number of COVID-19 cases and deaths for each county  
149 through June 7, 2020. County-level COVID-19 mortality/incidence rates were defined as the  
150 ratio of COVID-19 deaths/cases to county level population size.(Wu et al. 2020)

151  
152 *Greenness exposure*

153 For each county, the Normalized Difference Vegetation Index (NDVI) was estimated using  
154 satellite imagery. The NDVI is calculated as the ratio between the red and near infrared values,  
155 and ranges from -1 to 1.(NASA 2020) Values close to 1 correspond to areas with complete  
156 coverage by live green vegetation, values close to zero correspond to areas without much live  
157 vegetation (e.g. rocks, sand) and negative values correspond to water. We used Landsat 8  
158 (Collection 1 Tier 1 Operational Land Imager DN values, representing scaled, calibrated at  
159 sensor radiance (USGS 2020)) images for the entire US from April 1, 2020 up to May 31, 2020,  
160 to represent the exposure during the initial COVID-19 outbreak in the US. Landsat 8 images are  
161 generated every 16 days at 30m resolution. Using Google Earth Engine  
162 (<https://earthengine.google.com/>), cloud-free Landsat composites were created for the US. We  
163 calculated the spatially weighted mean April-May NDVI for each county in the US, after setting  
164 negative NDVI values to zero. For sensitivity analyses, we also used Landsat 8 images from June  
165 1, 2019 up to August 31, 2019, to calculate the spatially weighted mean summer NDVI for each  
166 county. County shapefiles were based on the US Census Bureau Tiger dataset of 2018.(US  
167 Census Bureau 2020)

168  
169 *Potential confounders*

170 To adjust for potential confounding bias, we obtained data on several variables that might be  
171 linked to green space and COVID-19 incidence and mortality. We collected eleven county level  
172 Census variables from the 2000 Census (<https://www.census.gov>) and the 2010 5-year American  
173 Community Surveys (<https://www.census.gov/programs-surveys/acs/>): proportion of residents  
174 older than 65, proportion of residents aged 15-44, proportion of residents aged 45-64, proportion  
175 of Hispanic residents, proportion of Black residents, median household income, median home  
176 value, proportion of residents in poverty, proportion of residents with a high school diploma,  
177 population density, and proportion of residents that own their house. From the Behavioral Risk  
178 Factor Surveillance System (BRFSS) (<https://www.countyhealthrankings.org/>) we obtained the  
179 proportion of individuals that were obese and the proportion of current smokers in 2011, the  
180 most recent year available.

181  
182 We used days since first COVID-19 case reported in a county as a proxy for stage of the  
183 COVID-19 outbreak. Further, we linked days since issuance of stay-at-home order (state-level),  
184 days since closure of non-essential businesses (state-level), and days since nursing home visitor

185 ban (state-level) from the COVID-19 US State Policy Database (Raifman et al. 2020) to our  
186 data. Since the availability of adequate hospital resources might influence COVID-19 outcomes,  
187 we collected county-level information on the number of hospital beds available in 2019 from the  
188 Homeland Infrastructure Foundation-Level Data (HIFLD). In addition, we used state level  
189 information on number of COVID-19 tests performed up to June 7, 2020 from the COVID  
190 tracking project (<https://covidtracking.com/>).

191  
192 Based on previous studies implicating relations between exposure to particulate matter less than  
193 2.5 microns (PM<sub>2.5</sub>), temperature and/or relative humidity and COVID-19 incidence and  
194 mortality (Wu et al. 2020; Raines et al. 2020), we also adjusted our analyses for these factors.  
195 Temperature and relative humidity data were available from Gridmet, and we created long-term  
196 (2000-2016) summer (June-August) and winter (December-February) averages for each  
197 county.(Abatzoglou 2013) PM<sub>2.5</sub> concentration estimates for 2000-2016 were derived from an  
198 established exposure prediction model.(Van Donkelaar et al. 2019)

199  
200 *Statistical methods*

201 We used negative binomial mixed models to evaluate associations of NDVI with COVID-19  
202 incidence and mortality. We report mortality rate ratios (MRR) and incidence rate ratios (IRR),  
203 i.e., exponentiated effect estimates from the negative binomial mixed model, and 95% CI per 0.1  
204 unit NDVI increase. To evaluate effects of potential confounders, we specified a series of models  
205 with increasing covariate adjustment. In model 1 we only included a population size offset and a  
206 random intercept by state. In model 2 we additionally adjusted for degree of urbanization. In  
207 model 3 we added all county-level SES covariates and BRFSS covariates. In model 4 we added  
208 date since first COVID-19 case reported, date since issuance of stay-at-home order for each state,  
209 number of hospital beds per unit population. In model 5 we additionally included temperature,  
210 relative humidity and PM<sub>2.5</sub> (main model for COVID-19 mortality). The number of tests per unit  
211 population was added to model 6 (main model for COVID-19 incidence). We used a general  
212 additive mixed model with penalized cubic regression splines (with 2 degrees of freedom as the  
213 upper limit) to evaluate whether the association of NDVI with COVID-19 mortality and  
214 incidence was linear in the full cohort, in rural counties, and in urban counties. We carried out all  
215 analyses in R statistical software and performed model fitting using the lme4 package or the  
216 gamm4 package (for spline analyses).(Package “lme4”; Package “gamm4”)

217  
218 We evaluated whether associations of NDVI with COVID-19 deaths and cases were modified by  
219 population density, proportion of black residents, median home value, and issuance of stay-at-  
220 home order by adding an interaction term to the model. Significance of interaction terms were  
221 tested by Chi-square tests between the models with and without the interaction terms. We  
222 hypothesized that associations of NDVI with COVID-19 incidence and mortality were stronger  
223 in densely populated counties, in counties with issuance of stay-at-home orders, in counties with  
224 higher proportions of black residents, and in counties with lower median home values.

225  
226 We conducted several sensitivity analyses to assess the robustness of the associations. We  
227 evaluated associations of summer NDVI in the full population, and in urban and rural counties.  
228 We excluded 27 counties comprising the New York metropolitan area (n = 3,062), as this area  
229 experienced the most severe COVID-19 outbreak. We also conducted analysis excluding  
230 counties with 10 or fewer confirmed COVID-19 cases. We additionally added days since closure

231 of non-essential businesses and days since nursing home visitor ban to our models. To evaluate  
232 the impact of potential spatial residual confounding, we additionally added longitude and latitude  
233 of the centroid of each county to the models. In addition, we used county averages of NDVI with  
234 negative values excluded (instead of set to zero).

235

## 236 **Results**

237 Our study cohort consisted of 3,089 counties of which 2,297 counties reported more than 10  
238 cases. The highest COVID-19 death rates were in New York, Illinois, Michigan, Florida,  
239 Louisiana, and California (Figure 1). COVID-19 incidence rates were more equally spread over  
240 the US. NDVI values were high along the West coast and in the South. The median COVID-19  
241 death rate per 100,000 individuals was 2.8 and the median COVID-19 incidence rate per 100,000  
242 individuals was 163.5 (Table 2). NDVI was moderately positively correlated with % Black, %  
243 smoke, and PM<sub>2.5</sub>, and weakly negatively correlated with median household income (Figure S1).

244

245 In main models (model 5 for mortality and model 6 for incidence) we found an IRR of 0.94  
246 (95% CI: 0.90, 0.97) and a MRR of 0.99 (95% CI: 0.94, 1.05) per 0.1 unit increase in NDVI.  
247 There was little impact of population density on estimates; however, effects were attenuated in  
248 models that included county-level SES, BMI and smoking (Figure S2). The additional inclusion  
249 of epidemic stage, timing of stay-at-home-orders, hospital beds per capita, long-term exposures  
250 to PM<sub>2.5</sub>, weather and COVID test rate did not confound the association. Estimated IRR and  
251 MRR for all covariates included in the fully adjusted models can be found in Table S2. The  
252 overall exposure-response curve for COVID-19 incidence showed some small evidence of  
253 deviations from linearity, with a potential threshold effect around an NDVI of 0.5 (Figure 2). For  
254 urban counties, the curve for COVID-19 incidence was inverse and linear, while for rural  
255 counties increasing NDVI appeared beneficial at the lower end of the distribution only. Similar  
256 patterns, although slightly less pronounced, were observed for COVID-19 mortality.

257

258 Associations of NDVI with COVID-19 incidence and mortality were positive in the lowest  
259 densely populated counties and negative in the highest densely populated counties (Figure 3).  
260 For COVID-19 incidence, but not for mortality, we found stronger associations for counties with  
261 higher median home values and issuance of stay-at-home orders. Associations of NDVI with  
262 COVID-19 incidence were similar across quintiles of the proportion Black residents, while we  
263 found a positive association with COVID-19 mortality in the lowest quintile.

264

265 In sensitivity analyses, associations were robust to additional adjustment for potential spatial  
266 clustering, days since closures of non-essential businesses or days since a nursing home visitor  
267 ban, exclusions of the NYC metro area, restriction to counties with at least 10 cases, or  
268 alternative procedure for calculating NDVI. (Figure S3). In the full cohort, associations of  
269 summer NDVI with COVID-19 incidence and mortality were weakly negative, but not-  
270 significant (Table S3). For urban counties, we found an IRR of 0.96 (95% CI: 0.91, 1.01) and a  
271 MRR of 0.94 (95% CI: 0.88, 1.00) per 0.1 unit increase in summer NDVI.

272

## 273 **Discussion**

274 We observed that greenness in April-May of 2020 was inversely associated with COVID-19  
275 incidence, especially in urban counties. An increase of 0.1 in NDVI was associated with a 6%  
276 decrease in COVID-19 incidence rate after adjustment for potential confounders at the county

277 level. Associations with COVID-19 incidence were stronger in more densely populated counties,  
278 and in counties with stay-at-home orders. NDVI was not associated with COVID-19 mortality in  
279 all counties; however, NDVI was protective in counties with higher population density.

280  
281 Several studies indicated that environmental exposures, such as air pollution, temperature, and  
282 humidity, could affect the spread and impact of infectious diseases because of their impact on  
283 host susceptibility and virus stability/survival. (Moriyama et al. 2020; Ciencewicki and Jaspers  
284 2007; Martelletti and Martelletti 2020; Dowell and Shang Ho 2004) To the best of our  
285 knowledge, there are no studies that evaluated the effect of greenness on the spread and impact  
286 of infectious diseases. Since the COVID-19 outbreak, social distancing policies and guidelines  
287 have led to more time spent at home and therefore people may be more dependent on their  
288 immediate surroundings. Because gyms were closed in large parts of the US during this time  
289 period, people may have relied on parks to be physically active. Parks also provide places for  
290 social gatherings outdoors while remaining the recommended safe distance (six feet). Being  
291 outside might substantially reduce the chance of SARS-CoV-2 transmission. According to a  
292 study performed among 7,324 identified cases in China, only a single small outdoor outbreak  
293 was identified.(Qian et al. 2020).

294  
295 We found stronger associations between NDVI and COVID-19 incidence. This seems plausible  
296 as neighborhood green space might affect contact rates and therefore COVID-19 incidence,  
297 while COVID-19 mortality also depends on available treatments and on host susceptibility, such  
298 as age and presence of chronic diseases. Several reviews showed inverse associations of  
299 greenness with a variety of diseases.(Fong et al. 2018; James et al. 2015) A couple of studies also  
300 reported inverse associations with cardiovascular and respiratory disease mortality, even after  
301 adjustment for air pollution.(Crouse et al. 2017; Vienneau et al. 2017) This suggests that  
302 increased amounts of greenness could influence host susceptibility. For COVID-19 incidence,  
303 associations were stronger (and linear) in urban versus rural counties. This is in line with the  
304 literature on the health effects of green spaces, which suggest benefits of green space are stronger  
305 in urban areas.(Fong et al. 2018) In urban areas, vegetation likely represents urban parks and  
306 street greenery, which are generally accessible and suitable spaces for recreational activities.  
307 This may not be true for vegetation in rural areas.

308  
309 Associations of April-May NDVI differed a bit from associations of summer NDVI. Summer  
310 NDVI was weakly, but not significantly, associated with COVID-19 incidence and mortality.  
311 April-May NDVI was stronger associated with COVID-19 incidence, while summer NDVI was  
312 slightly stronger associated with mortality. We speculate that summer NDVI might better capture  
313 the long-term impact of greenness on health and therefore the impact of greenness on host  
314 susceptibility, while April-May NDVI might better capture the impact of greenness on contact  
315 rates as it largely overlaps with the beginning of the COVID-19 outbreak.

316  
317 For COVID-19 incidence, we found stronger associations in densely populated counties and  
318 counties with high median home values. Median home value is likely related to health insurance  
319 and the ability to work from home, which affects COVID-19 incidence. The positive associations  
320 of NDVI with COVID-19 mortality in the lowest population density quintiles could be because  
321 an increase in greenness in these areas is related to limited access to health care. Associations of  
322 NDVI with COVID-19 incidence were modified by state-level issuance of stay-at-home orders.

323 Individuals living in states with stay-at-home orders might spend more time at home and are thus  
324 more dependent on their immediate surroundings, like greenness. Individuals living in states  
325 without stay-at-home orders might not practice social distancing and may differ in COVID-19  
326 health risk perceptions. However, differences in associations could also be due to differences in  
327 epidemic stage (number of COVID-19 cases) in counties with and without stay-at-home orders.  
328 Associations of NDVI with COVID-19 mortality, but not COVID-19 incidence, were modified  
329 by percentage Black. NDVI was harmful in the counties with the lowest proportion of Black  
330 residents, but not in other quintiles. This finding may be related to higher observed rates of  
331 mortality among Black individuals, or may reflect the moderate correlation between percentage  
332 of Black residents and population density.

333  
334 This study has several strengths. We used NDVI for April-May 2020, largely overlapping with  
335 the beginning of the COVID-19 outbreak in the US, allowing us to assess the impact of  
336 temporally relevant exposures on incidence and mortality. Associations of NDVI with COVID-  
337 19 incidence remained in analyses stratified by urban-rural status or population density,  
338 indicating that our associations are not a result of differences in urban-rural COVID-19 incidence  
339 or testing rates. We adjusted for several potentially important confounders, such as proportion  
340 Black residents, population density, and days since first COVID-19 case. We note that NDVI  
341 was moderately positively (Spearman  $\rho > 0.40$ ) correlated with % less than high school  
342 education, % Black residents, % current smokers, and  $PM_{2.5}$ , while these variables were all  
343 positively associated with COVID-19 incidence and mortality. Further, sensitivity analyses  
344 showed that associations were robust to exclusion of counties with 10 or fewer COVID-19 cases,  
345 excluding all counties comprising the New York metropolitan area and additional adjustment for  
346 physical distance closures and potential spatial clustering.

347  
348 We acknowledge that this study has several limitations. This is an ecological study with  
349 aggregated data on county level. Ecological designs should not be used to make inferences about  
350 individual risks even though they are valid for hypothesis-generating purposes. Publicly  
351 available COVID-19 outcome data was only available at county level, while COVID-19  
352 incidence and mortality, and sociodemographic characteristics likely vary at a smaller spatial  
353 scale. (Villeneuve and Goldberg 2020) COVID-19 events are not independent and likely cluster  
354 over time and space which may have resulted in biased effect estimates. (Villeneuve and  
355 Goldberg 2020) Although we adjusted for several important confounders, such as days since first  
356 COVID-19 case reported and days since stay-at-home order, it is possible that there is residual  
357 confounding by these factors. Days since stay-at-home order is based on the start date of the  
358 issuance of the order. However, in several states the stay-at-home order was ended/relaxed in  
359 (the end of) April or May (earlier than June 7). Further, there are other state-level physical  
360 distance closures (e.g. day cares, K-12 schools, gyms) that we did not take into account. As  
361 additional adjustment for days since non-essential business closure and days since nursing home  
362 visitor ban did not affect our associations, we do not think that adjustments for additional  
363 closures would greatly impact our findings. We also note that physical distance closures and face  
364 coverings requirements could differ between counties within a state. We used a county-level  
365 vegetation index as a proxy for green space access, which does not distinguish whether  
366 vegetation represents urban parks, forests, agricultural land, or overgrown vacant lots. Detail on  
367 park amenities, vegetation species or typology, and park usage during the COVID-19 pandemic  
368 were unavailable at the time of data collection, but would add to future analyses. Another major



369 limitation is the underreporting of COVID-19 cases and deaths. Widespread testing has been  
370 limited in most areas of the US and differences in testing availability might differ between  
371 counties and could have changed over time due to additional resources and increased recognition  
372 of the disease.

373  
374 Despite these limitations, our findings suggest that exposures to greenness had beneficial impacts  
375 on county-level incidence of COVID-19 in the US and may have reduced county-level COVID-  
376 19 mortality rates, especially in areas of higher population density. Although casual  
377 relationships cannot be drawn from ecological studies, our findings imply that keeping parks  
378 open, maintaining funding for parks in light of coming surges of COVID-19 and future  
379 pandemics may have important public health benefits.

380  
381

## 382 **References**

- 383 Abatzoglou JT. 2013. Development of gridded surface meteorological data for ecological  
384 applications and modelling. *Int J Climatol* 33:121–131; doi:10.1002/joc.3413.
- 385 Banay RF, James P, Hart JE, Kubzansky LD, Spiegelman D, Okereke OI, et al. 2019. Greenness  
386 and Depression Incidence among Older Women. *ehp.niehs.nih.gov* 127;  
387 doi:10.1289/EHP1229.
- 388 Beveridge C, Hoffman C. 1997. *The Papers of Frederick Law Olmsted: Writings on Public Parks,*  
389 *Parkways, and Park Systems. Supplementary Series. Vol. 1.*
- 390 Bezold CP, Banay RF, Coull BA, Hart JE, James P, Kubzansky LD, et al. 2018. The Association  
391 Between Natural Environments and Depressive Symptoms in Adolescents Living in the  
392 United States. *J Adolesc Heal* 62:488–495; doi:10.1016/j.jadohealth.2017.10.008.
- 393 CDC (Centers for Disease Control and Prevention). Coronavirus Disease 2019 (COVID-19) | 2020  
394 Interim Case Definition, Approved April 5, 2020. Available:  
395 [https://wwwn.cdc.gov/nndss/conditions/coronavirus-disease-2019-covid-19/case-](https://wwwn.cdc.gov/nndss/conditions/coronavirus-disease-2019-covid-19/case-definition/2020/)  
396 [definition/2020/](https://wwwn.cdc.gov/nndss/conditions/coronavirus-disease-2019-covid-19/case-definition/2020/) [accessed 16 June 2020].
- 397 Ciencewicky J, Jaspers I. 2007. Air pollution and respiratory viral infection. *Inhal Toxicol*  
398 19:1135–1146; doi:10.1080/08958370701665434.
- 399 Crouse DL, Pinault L, Balram A, Hystad P, Peters PA, Chen H, et al. 2017. Urban greenness and  
400 mortality in Canada’s largest cities: a national cohort study. *Lancet Planet Heal* 1:e289–  
401 e297; doi:10.1016/S2542-5196(17)30118-3.
- 402 Delamater PL, Street EJ, Leslie TF, Yang YT, Jacobsen KH. 2019. Complexity of the basic  
403 reproduction number (R0). *Emerg Infect Dis* 25:1–4; doi:10.3201/eid2501.171901.
- 404 Dong E, Du H, Gardner L. 2020. An interactive web-based dashboard to track COVID-19 in real  
405 time. *thelancet.com*; doi:10.1016/S1473-3099(20)30120-1.
- 406 Dowell SF, Shang Ho M. 2004. Seasonality of infectious diseases and severe acute respiratory  
407 syndrome - What we don’t know can hurt us. *Lancet Infect Dis* 4:704–708;  
408 doi:10.1016/S1473-3099(04)01177-6.
- 409 Fong KC, Hart JE, James P. 2018. A Review of Epidemiologic Studies on Greenness and Health:  
410 Updated Literature Through 2017. *Curr Environ Heal reports* 5:77–87; doi:10.1007/s40572-  
411 018-0179-y.
- 412 Heederik DJJ, Smit LAM, Vermeulen RCH. 2020. Go slow to go fast: A plea for sustained  
413 scientific rigor in air pollution research during the COVID-19 pandemic. *Eur Respir J*

- 414 2001361; doi:10.1183/13993003.01361-2020.
- 415 James P, Banay RF, Hart JE, Laden F. 2015. A Review of the Health Benefits of Greenness.  
416 *Current epidemiology reports*, 2(2), pp.131-142. ; doi:10.1007/s40471-015-0043-7.
- 417 Johns Hopkins Coronavirus Resource Center. 2020. COVID-19 United States Cases by County.  
418 Available: <https://coronavirus.jhu.edu/us-map> [accessed 17 July 2020].
- 419 Kaplan R & Kaplan S. 1989. *The Experience of Nature: A Psychological Perspective* - Rachel  
420 Kaplan, Stephen Kaplan - Google Books. Available:  
421 [https://books.google.com/books?hl=en&lr=&id=7l80AAAAIAAJ&oi=fnd&pg=PR7&dq=The+](https://books.google.com/books?hl=en&lr=&id=7l80AAAAIAAJ&oi=fnd&pg=PR7&dq=The+Experience+of+Nature:+A+psychological+perspective.+&ots=TpQ-NDt34l&sig=4s4Rdvae2yJ5xlXfpe1nRscE_Wk#v=onepage&q=The+Experience+of+Nature%3A+A+psychological+perspective.&f=false)  
422 [Experience+of+Nature:+A+psychological+perspective.+&ots=TpQ-](https://books.google.com/books?hl=en&lr=&id=7l80AAAAIAAJ&oi=fnd&pg=PR7&dq=The+Experience+of+Nature:+A+psychological+perspective.+&ots=TpQ-NDt34l&sig=4s4Rdvae2yJ5xlXfpe1nRscE_Wk#v=onepage&q=The+Experience+of+Nature%3A+A+psychological+perspective.&f=false)  
423 [NDt34l&sig=4s4Rdvae2yJ5xlXfpe1nRscE\\_Wk#v=onepage&q=The Experience of Nature%3A](https://books.google.com/books?hl=en&lr=&id=7l80AAAAIAAJ&oi=fnd&pg=PR7&dq=The+Experience+of+Nature:+A+psychological+perspective.+&ots=TpQ-NDt34l&sig=4s4Rdvae2yJ5xlXfpe1nRscE_Wk#v=onepage&q=The+Experience+of+Nature%3A+A+psychological+perspective.&f=false)  
424 [A psychological perspective.&f=false](https://books.google.com/books?hl=en&lr=&id=7l80AAAAIAAJ&oi=fnd&pg=PR7&dq=The+Experience+of+Nature:+A+psychological+perspective.+&ots=TpQ-NDt34l&sig=4s4Rdvae2yJ5xlXfpe1nRscE_Wk#v=onepage&q=The+Experience+of+Nature%3A+A+psychological+perspective.&f=false) [accessed 17 July 2020].
- 425 Martelletti L, Martelletti P. Air Pollution and the Novel Covid-19 Disease: a Putative Disease Risk  
426 Factor. Springer; doi:10.1007/s42399-020-00274-4.
- 427 Moriyama M, Hugentobler WJ, Iwasaki A. 2020. Seasonality of Respiratory Viral Infections.  
428 *Annu Rev Virol* 7:83–101; doi:10.1146/annurev-virology-012420-022445.
- 429 NASA. 2020. Measuring Vegetation (NDVI & EVI). Available:  
430 [https://earthobservatory.nasa.gov/features/MeasuringVegetation/measuring\\_vegetation\\_](https://earthobservatory.nasa.gov/features/MeasuringVegetation/measuring_vegetation_2.php)  
431 [2.php](https://earthobservatory.nasa.gov/features/MeasuringVegetation/measuring_vegetation_2.php) [accessed 16 June 2020].
- 432 Package “gamm4”. 2020. <https://cran.r-project.org/web/packages/gamm4/gamm4.pdf>
- 433 Package “lme4.” 2020. <https://cran.r-project.org/web/packages/lme4/lme4.pdf>
- 434 Prem K, Liu Y, Russell TW, Kucharski AJ, Eggo RM, Davies N, et al. 2020. The effect of control  
435 strategies to reduce social mixing on outcomes of the COVID-19 epidemic in Wuhan,  
436 China: a modelling study. *Lancet Public Heal* 5:e261–e270; doi:10.1016/S2468-  
437 2667(20)30073-6.
- 438 Qian H, Miao T, Liu L, Zheng X, Luo D, Li Y. 2020. Indoor transmission of SARS-Cov-2.  
439 [medrxiv.org](https://medrxiv.org); doi:10.1101/2020.04.04.20053058.
- 440 Raifman J, Nocka K, Jones D, Bor J, Lipson S, Jay J. 2020. COVID-19 US state policy database.
- 441 Raines KS, Doniach S, Bhanot G. 2020. The transmission of SARS-CoV-2 is likely comodulated by  
442 temperature and by relative humidity.; doi:10.1101/2020.05.23.20111278.
- 443 Sohrabi C, Alsafi Z, O’Neill N, Khan M, Kerwan A, Al-Jabir A, et al. 2020. World Health  
444 Organization declares global emergency: A review of the 2019 novel coronavirus (COVID-  
445 19). *Int J Surg* 76:71–76; doi:10.1016/j.ijssu.2020.02.034.
- 446 Tammes P. 2020. Social distancing, population density, and spread of COVID-19 in England: a  
447 longitudinal study. *BJGP open*; doi:10.3399/bjgpopen20X101116.
- 448 US census bureau. 2020. Geography Program. Available: [https://www.census.gov/programs-](https://www.census.gov/programs-surveys/geography.html)  
449 [surveys/geography.html](https://www.census.gov/programs-surveys/geography.html) [accessed 16 June 2020].
- 450 USGS (United States Geological Survey). 2020. Landsat 8 Data Users Handbook. Available:  
451 <https://www.usgs.gov/media/files/landsat-8-data-users-handbook> [accessed 16 June  
452 2020].
- 453 Ulrich RS. 1984. View through a window may influence recovery from surgery. *Science* (80- )  
454 224:420–421; doi:10.1126/science.6143402.
- 455 Van Donkelaar A, Martin R V., Li C, Burnett RT. 2019. Regional Estimates of Chemical  
456 Composition of Fine Particulate Matter Using a Combined Geoscience-Statistical Method  
457 with Information from Satellites, Models, and Monitors. *Environ Sci Technol* 53:2595–

458 2611; doi:10.1021/acs.est.8b06392.  
459 Vienneau D, Hoogh K de, Faeh D, Kaufmann M, Wunderli JM, Rösli M. et al. 2017. More than  
460 clean air and tranquillity: residential green is independently associated with decreasing  
461 mortality. Elsevier.  
462 Villeneuve PJ, Goldberg MS. 2020. Methodological Considerations for Epidemiological Studies  
463 of Air Pollution and the SARS and COVID-19 Coronavirus Outbreaks. Environ Health  
464 Perspect 128:095001; doi:10.1289/EHP7411.  
465 WHO 2020a. Coronavirus Disease (COVID-19) Situation Reports. Available:  
466 <https://www.who.int/emergencies/diseases/novel-coronavirus-2019/situation-reports/>  
467 [accessed 20 July 2020].  
468 WHO 2020b. WHO Director-General's opening remarks at the media briefing on COVID-19 - 11  
469 March 2020. Available: [https://www.who.int/dg/speeches/detail/who-director-general-s-](https://www.who.int/dg/speeches/detail/who-director-general-s-opening-remarks-at-the-media-briefing-on-covid-19---11-march-2020)  
470 [opening-remarks-at-the-media-briefing-on-covid-19---11-march-2020](https://www.who.int/dg/speeches/detail/who-director-general-s-opening-remarks-at-the-media-briefing-on-covid-19---11-march-2020) [accessed 17 July  
471 2020].  
472 Wu X, Nethery RC, Sabath MB, Braun D, Dominici F. 2020. Air pollution and COVID-19 mortality  
473 in the United States: Strengths and limitations of an ecological regression analysis. Sci Adv  
474 6:eabd4049; doi:10.1126/sciadv.abd4049.  
475  
476  
477  
478  
479  
480  
481  
482  
483  
484  
485  
486  
487  
488  
489  
490  
491  
492  
493  
494  
495  
496  
497  
498  
499  
500  
501  
502

503 **Table 1. Descriptive statistics of the full cohort (n = 3,089 U.S. counties) <sup>a</sup>.**  
504

| Variable                                         | Median (IQR)    |
|--------------------------------------------------|-----------------|
| COVID-19 death rate (per 100,000)                | 2.8 (13.4)      |
| COVID-19 incidence rate (per 100,000)            | 163.5 (330.2)   |
| NDVI (April-May 2020)                            | 0.44 (0.27)     |
| NDVI (June-August 2019)                          | 0.63 (0.21)     |
| Population density (person/sq. mi.)              | 60.6 (208.7)    |
| % in poverty                                     | 9.2 (6.1)       |
| % owner occupied housing                         | 76.7 (9.3)      |
| % less than high school education                | 19.1 (13.2)     |
| % Black                                          | 1.4 (7.8)       |
| % Hispanic                                       | 3.1 (5.8)       |
| % 65 years of age                                | 15.6 (5.0)      |
| % 45-64 years of age                             | 26.5 (2.9)      |
| % 15-44 years of age                             | 37.9 (5.4)      |
| Median home value (\$1,000)                      | 110.3 (67.7)    |
| Median household income (\$1,000)                | 47.7 (15.2)     |
| % Obese                                          | 33.1 (7.2)      |
| % Smoke                                          | 17.0 (4.8)      |
| Days since stay-at-home order                    | 68 (74)         |
| Days since non-essential businesses closure      | 69 (74)         |
| Days since nursing homes visitor ban             | 62 (83)         |
| Days since first case                            | 74 (13)         |
| Rate of hospital beds (per 100,000)              | 50 (173)        |
| Rate of tests (per 100,000)                      | 5670.7 (2394.6) |
| Average summer temperature (K)                   | 303.3 (5.0)     |
| Average winter temperature (K)                   | 280.2 (10.5)    |
| Average summer relative humidity (%)             | 91.3 (6.7)      |
| Average winter relative humidity (%)             | 88 (5.6)        |
| PM <sub>2.5</sub> (µg/m <sup>3</sup> )           | 8.8 (4.1)       |
| Urban counties [NCHS classification ≤4 (n)]      | 1149            |
| Counties with issuance of stay-at-home order (n) | 2196            |
| Counties with 10< cases (n)                      | 2297            |

505  
506  
507  
508  
509  
510  
511  
512

<sup>a</sup> The number of COVID-19 cases and deaths are based on data from March 22, 2020 through June 7, 2020.

It is made available under a [CC-BY-NC-ND 4.0 International license](https://creativecommons.org/licenses/by-nc-nd/4.0/).

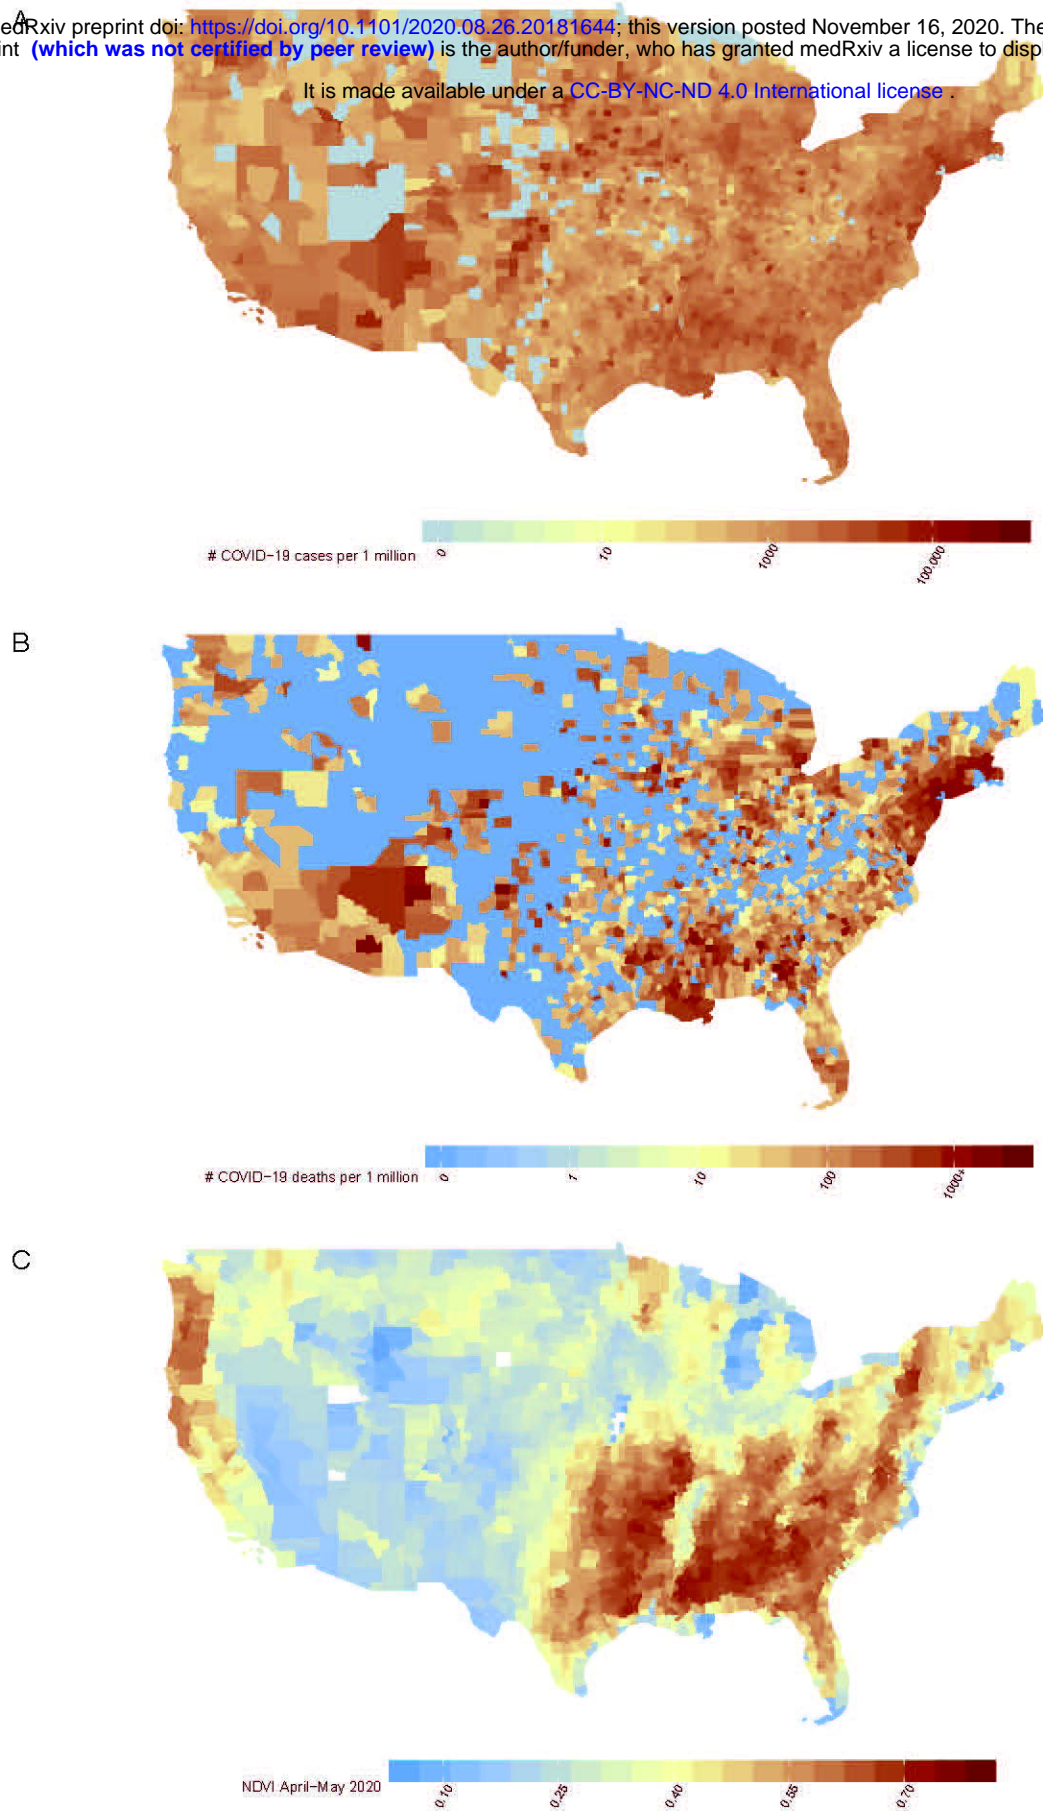

Figure 1. Maps of the US that show (A) the county-level number of COVID-19 cases per 1 million population in the United States up to and including June 7, 2020, (B) the county-level number of COVID-19 deaths per 1 million population in the United States up to and including June 7, 2020, and (C) county-level average NDVI (April-May 2020).

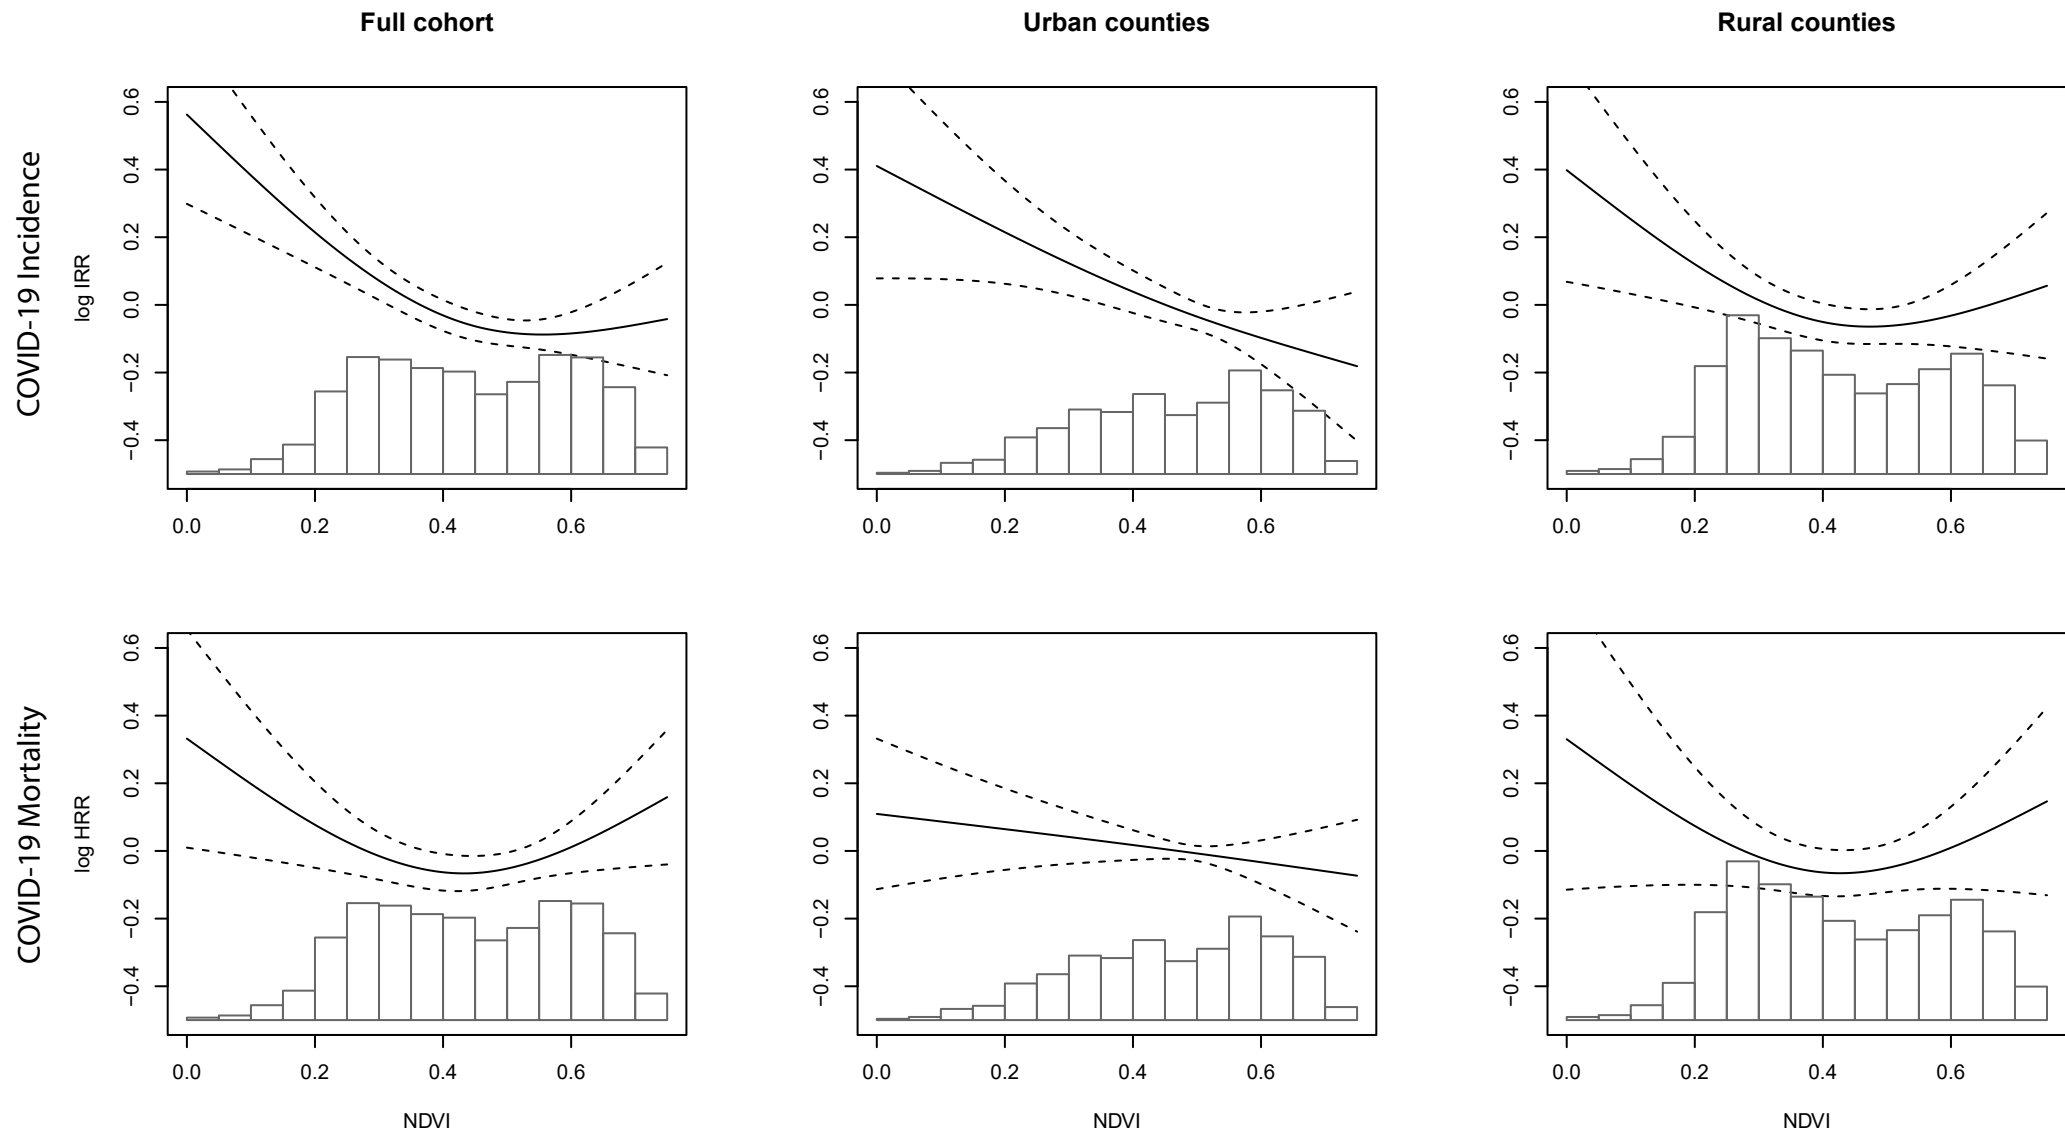

Figure 2. Exposure-response curves of the association of NDVI with COVID-19 incidence and COVID-19 mortality in the full cohort, in urban counties and in rural counties.

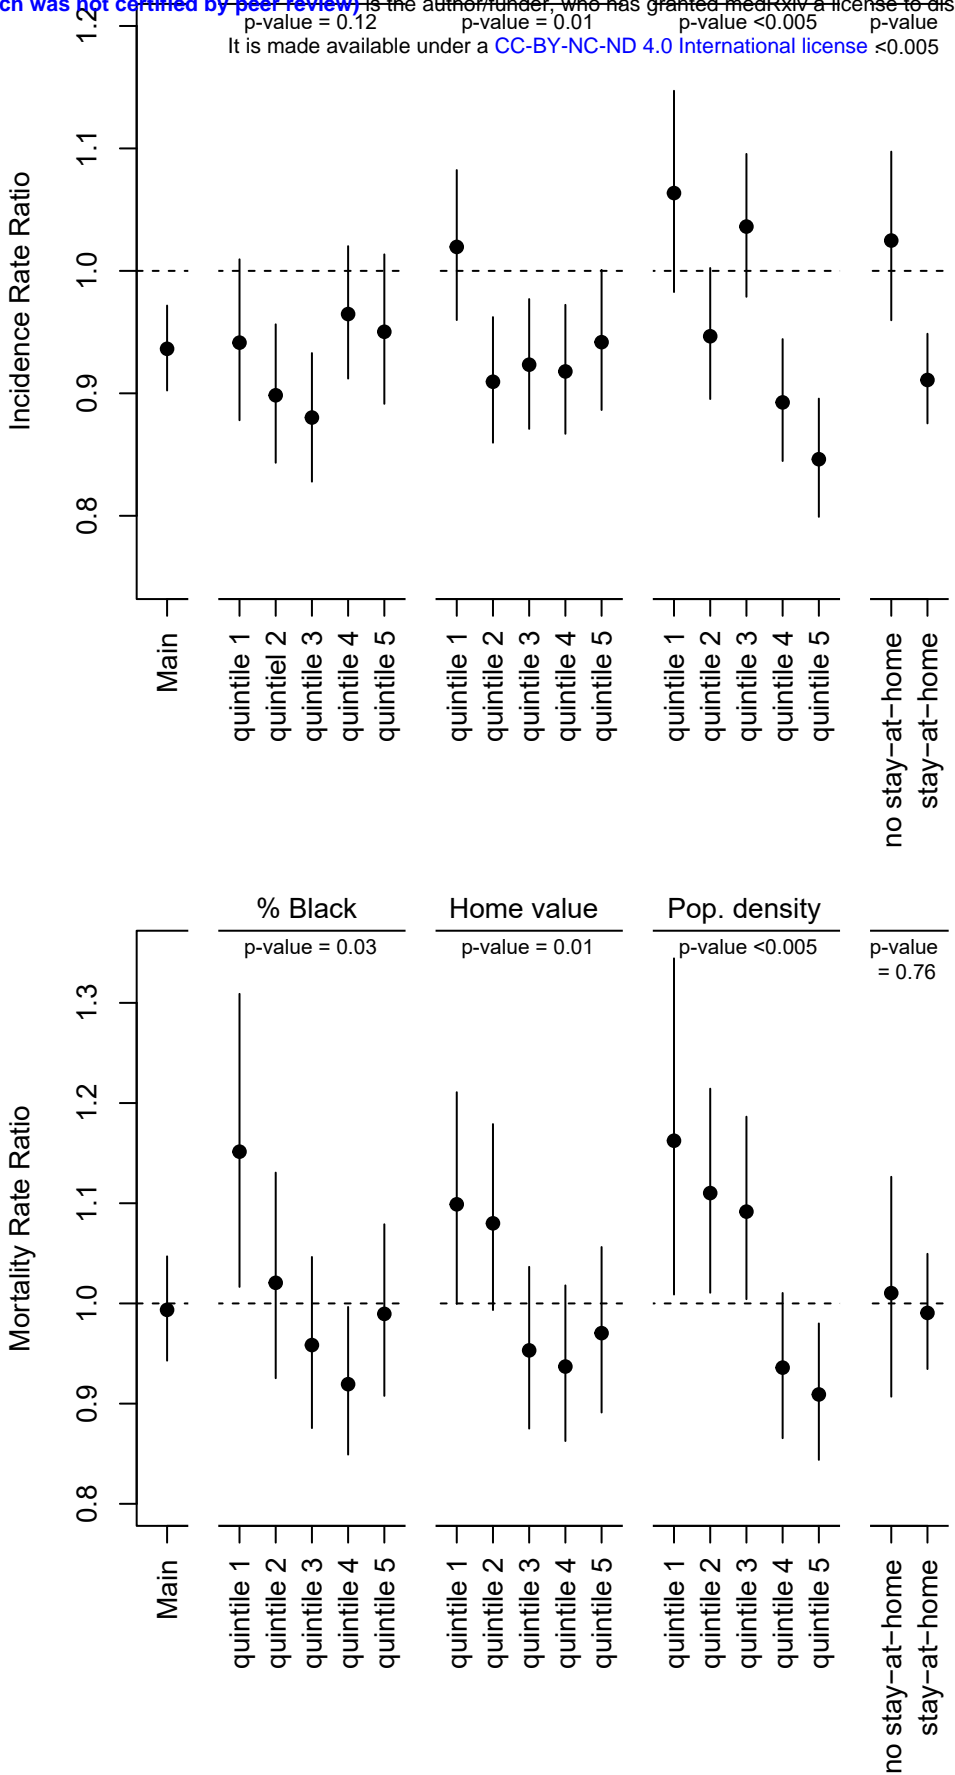

Figure 3. Associations of NDVI with COVID-19 incidence and COVID-19 mortality by strata. Main = main model, quintile 1 = lowest quintile, quintile 5 = highest quintile. Home value = median home value, Pop. density = population density, no stay-at-home = counties with no issuance of stay-at-home order, stay-at-home = counties with issuance of stay-at-home order

<sup>a</sup> Associations are expressed per 0.1 unit increase in NDVI.
